# Supplementary material for: Comparisons of the biodistribution and toxicological examinations after repeated intravenous administration of silver and gold nanoparticles in mice
Source: PubMed Central journal article supplement (PMC5468332; doi:10.1038/s41598-017-03015-1), 2017-06-12
Supplement: 41598_2017_3015_MOESM1_ESM.pdf [file 41598_2017_3015_MOESM1_ESM.pdf]

## Supplementary information

### Comparisons of the biodistribution and toxicological examinations after repeated intravenous administration of silver and gold nanoparticles in mice

*Lin Yang<sup>1</sup>, Huijuan Kuang<sup>1</sup>, Wanyi Zhang<sup>2</sup>, Zoraida P. Aguilar<sup>3</sup>, Hua Wei<sup>1</sup>, and Hengyi Xu<sup>1\*</sup>*

<sup>1</sup>State Key Laboratory of Food Science and Technology, Nanchang University, Nanchang 330047, China

<sup>2</sup>The Second Affiliated Hospital of Nanchang University, Nanchang 330000, China

<sup>3</sup>Zystein, LLC., Fayetteville, AR 72704, USA

\*Correspondence to:

**Dr. Hengyi Xu**

State Key Laboratory of Food Science and Technology, Nanchang University.

Address: 235 Nanjing East Road, Nanchang 330047, P.R. China.

Phone: +0086-791-8830-4447-ext-9520.

Fax: +0086-791-8830-4400.

E-mail: kidyxu@163.com; HengyiXu@ncu.edu.cn.

**Table S1.** Classical studies of biodistribution and toxicity of AuNPs/AgNPs in rodents via other exposure routes.

| NPs                 | Size (nm)      | Dose                                                                                            | Model | Exposure duration           | Tissue accumulation (in order of quantity)     | Conclusions                                                                                                                                                       | References |
|---------------------|----------------|-------------------------------------------------------------------------------------------------|-------|-----------------------------|------------------------------------------------|-------------------------------------------------------------------------------------------------------------------------------------------------------------------|------------|
| AgNPs               | 20, 15         | 90 mg kg <sup>-1</sup>                                                                          | Rats  | Oral, 28 d<br>Re 1, 8, 56 d | St, In, Sp, Te, Li, Br,<br>Ki, Lu, Bl, Bla, He | Oral exposure to AgNPs showed similar distribution pattern with silver salts, and no hepatotoxicity or immunotoxicity were observed                               | 1          |
| AgNPs               | 10, 25         | 100, 500 mg kg <sup>-1</sup>                                                                    | Rats  | Oral, 28 d<br>Re 1, 2, 4 m  | Sp, Ov, Li, Ki, Te, Br,<br>Bl,                 | Tissue clearance of the accumulated NPs over 4 recovery months, which size did not affect the silver distribution.                                                | 2          |
| AgNPs               | 60             | 30, 300, 1000 mg kg <sup>-1</sup>                                                               | Rats  | Oral, 28 d<br>Re 1 d        | St, Ki, Li, Lu, Te, Br,<br>Bl,                 | Gender-related and dose-dependent accumulation of silver content in tissues                                                                                       | 3          |
| AgNPs<br>Ag-acetate | 14             | 63, 126, 252 mg kg <sup>-1</sup>                                                                | Rats  | Oral, 28 d<br>Re 1 d        | NM                                             | No adverse effects were observed in rats after exposure to 14 nm AgNPs at a dose up to 252 mg kg <sup>-1</sup>                                                    | 4          |
| AgNPs<br>(PVP)      | 14 ± 4         | 252 mg kg <sup>-1</sup>                                                                         | Rats  | Oral, 28 d<br>Re 1 d        | Fe, In, Ki, Li, Br, Lu,<br>Pl, Mu, Ur          | Compared to AgNPs, silver acetate show higher concentrations throughout the rat body and lysosomes could be a likely target for side effects of silver.           | 5          |
| AgNPs               | 7.9 ± 0.95     | 1, 10 mg kg <sup>-1</sup>                                                                       | Rats  | Oral, once<br>Re 1, 4 d     | Fe, Li, Bl, Ki, Lu, Ur,                        | Bioavailability of AgNPs was extreme low after oral exposure, suggesting limited toxicity.                                                                        | 6          |
| AgNPs               | 20, 110        | 0.3, 3, 30 mg kg <sup>-1</sup>                                                                  | Mice  | Oral, 3 d<br>Re 2 d         | Fe, GIT, Sp, Li, Ki,                           | Oral administrative AgNPs at a dose of 30 mg kg <sup>-1</sup> was well-tolerated in mice and NPs size or coating show minimal effects on fecal elimination        | 7          |
| AgNPs<br>Ag-acetate | 10, 75,<br>110 | 9, 18, 36 mg kg <sup>-1</sup>                                                                   | Rats  | Oral, 13 w<br>Re 0.5 d      | MLN, Co, Je, Il, Ki,<br>Sp, Li, Bl, He, Ut     | AgNPs predominantly deposited within cells, while Ag-acetate had an affinity for extracellular membranes                                                          | 8          |
| AgNPs               | 18             | 0.7 × 10 <sup>6</sup> , 1.4 × 10 <sup>6</sup> , 2.9 × 10 <sup>6</sup> particles/cm <sup>3</sup> | Rats  | Ih, 6 h/d, 90 d             | NM                                             | Lung function changes such as the decreases in minute volume and tidal volume as well as lung inflammation were induced by prolonged inhalation exposure to AgNPs | 9          |

|                   |                          |                                                                                     |      |                                |                                         |                                                                                                                                                                                      |    |
|-------------------|--------------------------|-------------------------------------------------------------------------------------|------|--------------------------------|-----------------------------------------|--------------------------------------------------------------------------------------------------------------------------------------------------------------------------------------|----|
| AgNPs             | 18-19                    | $0.6 \times 10^6$ , $1.4 \times 10^6$ , $3.0 \times 10^6$ particles/cm <sup>3</sup> | Rats | Ih, 5 h/d, 5 d/w, 13 w         | Lu, OB, Li, Br, Ki, Bl                  | Inhalation exposure of AgNPs caused the inflammatory responses in the lung and liver.                                                                                                | 10 |
| AuNPs (PEGylated) | 11, 21, 31               | 0.07-0.30 mg kg <sup>-1</sup>                                                       | Rats | Ins, 1 h, 1 d                  | Lu, Li, Sp, Ca, Ki, He, Bl, Br          | The PEGylation had no effects on the translocation of AuNPs from the lungs to the circulation.                                                                                       | 11 |
| AuNPs             | 13, 105                  | $12.8 \pm 2.42$ , $13.7 \pm 1.32$ µg/m <sup>3</sup>                                 | Rats | Inh, 6 h/d, 5 d, Re 1, 3, 28 d | Lu, Li, Sp, Ki, Br, Te, Bl              | Small NPs had significantly higher concentrations in secondary target organs that translocated from lungs compared to large NPs                                                      | 12 |
| AgNPs             | 15, 410                  | 179, 167 µg/m <sup>3</sup>                                                          | Rats | Inh, 6 h/d, 4 d, Re 1, 7 d     | Lu, Li,                                 | Size-related silver nanoparticle distribution in respiratory tract with 410 nm NPs mainly deposited in upper airways and 15 nm NPs showed alveolar accumulation.                     | 13 |
| AgNPs (PVP)       | 70                       | 0.2, 1 mg kg <sup>-1</sup>                                                          | Rats | Ins, 1 d                       | NM                                      | Instillation of 1 mg kg <sup>-1</sup> AgNPs caused mild pulmonary toxicity, while no side effects were observed at a dose of 0.2 mg kg <sup>-1</sup>                                 | 14 |
| AuNPs             | 1.4, 5, 18, 80, 200, 2.8 | $0.8 \pm 0.1 - 34.5 \pm 2.0$ µg/rat                                                 | Rats | Ins, 1, 3, 24 h                | Lu, Ur, Ki, Ca, Bl, Li, Sp, Ut, He, Br, | Small AuNPs with high specific surface area (SSA) was more likely cross the air-blood barrier. While the translocation of NPs to the secondary tissues was independent with the SSA. | 15 |
| AuNPs             | 12.5                     | 0.32, 1.6, 3.2 mg kg <sup>-1</sup>                                                  | Mice | i.p., 8 d                      | Sp, Li, Ki, Lu, Br, Bl                  | Dose-dependent accumulation pattern of NPs and no subacute physiological damage.                                                                                                     | 16 |

The following abbreviations are used in the Table: NM – not mentioned, Inh – inhalation exposure, Ins – instillation exposure, i.p. – intraperitoneal injection. Re – recovery days, h – hours, d – days, w – weeks, m – months, PVP – polymer polyvinylpyrrolidone, Ov – ovary, Pl – plasma, Br – brain, He – heart, Li – liver, Lu – lung, OB – olfactory bulb, Ki – kidney, In – intestine, MLN – mesenteric lymph nodes, Co – colon, Il – ileum, Je – jejunum, Sp – spleen, GIT – gastro-intestinal tract, Fe – feces, St – stomach, Te – testes, Ut – uterus, Ur – urine, Ca – carcass, Bla – bladder, Bl – blood, Mu – muscle.

## References

1. Zande, M. *et al.* Distribution, elimination, and toxicity of silver nanoparticles and silver ions. *ACS Nano* **6**, 7427-7442 (2012).
2. Lee, J. H. *et al.* Biopersistence of silver nanoparticles in tissues from Sprague –Dawley rats. *Part. Fibre Toxicol.* **10**, 36 (2013).
3. Kim, Y. S. *et al.* Twenty-eight-day oral toxicity, genotoxicity, and gender-related tissue distribution of silver nanoparticles in Sprague-Dawley rats. *Inhal.Toxicol.* **20**, 575-83 (2008).
4. Sung, J. H. *et al.* Subacute oral toxicity investigation of nanoparticulate and ionic silver in rats. *Arch. Toxicol.* **86**, 543-51 (2012).
5. Loeschner, K. *et al.* Distribution of silver in rats following 28 days of repeated oral exposure to silver nanoparticles or silver acetate. *Part. Fibre Toxicol.* **8**, 18 (2011).
6. Park, K. *et al.* Bioavailability and toxicokinetics of citrate-coated silver nanoparticles in rats. *Arch. Pharm. Res.* **34**, 153-58 (2011).
7. Bergin, I. L., *et al.* Effects of particle size and coating on toxicologic parameters, fecal elimination kinetics and tissue distribution of acutely ingested silver nanoparticles in a mouse model. *Nanotoxicology* **10**, 352-360 (2016).
8. Boudreau, M. D., *et al.* Differential Effects of Silver Nanoparticles and Silver Ions on Tissue Accumulation, Distribution, and Toxicity in the Sprague Dawley Rat Following Daily Oral Gavage Administration for 13-Weeks. *Toxicol. Sci.* kfv318 (2016)
9. Sung, J. H. *et al.* Lung function changes in Sprague-Dawley rats after prolonged inhalation exposure to silver nanoparticles. *Inhal.Toxicol.* **20**, 567-74 (2008).
10. Sung, J. H. *et al.* Subchronic inhalation toxicity of silver nanoparticles. *Toxicol.Sci.* **108**, 452-61 (2009).
11. Lipka, J. *et al.* Biodistribution of PEG-modified gold nanoparticles following intratracheal instillation and intravenous injection. *Biomaterials* **31**,6574-81 (2010).
12. Han, S. G., *et al.* Size-dependent clearance of gold nanoparticles from lungs of Sprague–Dawley rats after short-term inhalation exposure. *Arch. Toxicol.* **89**, 1083-1094 (2015).
13. Braakhuis, H. M., *et al.* Particle size dependent deposition and pulmonary inflammation after short-term inhalation of silver nanoparticles. *Part. Fibre Toxicol.* **11**, 1 (2014).
14. Haberl, N., *et al.* Cytotoxic and proinflammatory effects of PVP-coated silver nanoparticles after intratracheal instillation in rats. *Beilstein J. Nanotech.* **4**, 933-940 (2013).
15. Kreyling, W. G., *et al.* Air–blood barrier translocation of tracheally instilled gold nanoparticles inversely depends on particle size. *ACS nano* **8**, 222-233 (2013).
16. Lasagna-Reeves, C. *et al.* Bioaccumulation and toxicity of gold nanoparticles after repeated administration in mice. *Biochem. Bioph. Res. Co.* **393**, 649-55 (2010).

**Table S2.** The visceral index of organs of Kunming mice following intravenous injection of AgNPs and/or AuNPs. D1 and D28 refer to collection of mice organ on post-injection in day 1 and day 28. These results show mean and standard deviation, n=5. \*: P < 0.05 versus the control group.

| NPs         | BW (g)     | Liver (mg/g) | Spleen (mg/g) | Kidney (mg/g) | Lung (mg/g) | Heart (mg/g) | Brain (mg/g) | Testis (mg/g) | Seminal vesicle (mg/g) |
|-------------|------------|--------------|---------------|---------------|-------------|--------------|--------------|---------------|------------------------|
| AgNPs (D1)  | 38.59±1.81 | 54.11±3.22   | 5.67±1.75     | 14.86±1.44    | 5.96±0.59   | 4.87±0.68    | 11.26±0.52   | 6.20±1.12*    | 7.59±0.84              |
| AuNPs (D1)  | 39.33±3.06 | 46.59±6.94   | 4.65±1.25     | 14.92±1.65    | 6.25±1.59   | 5.99±1.08    | 10.25±0.74   | 5.90±0.63*    | 7.71±1.97              |
| AgNPs (D28) | 42.65±1.68 | 50.68±9.70   | 2.58±0.36*    | 14.67±3.49    | 6.68±1.73   | 5.38±0.72    | 9.04±0.52*   | 5.73±0.84*    | 6.20±2.13*             |
| AuNPs (D28) | 42.87±3.18 | 49.46±5.66   | 2.95±0.91*    | 16.18±1.59    | 6.91±2.61   | 5.43±0.69    | 9.62±1.68    | 6.23±0.94*    | 5.78±0.63*             |
| Control     | 41.16±1.07 | 52.42±4.92   | 4.77±1.06     | 18.08±0.61    | 7.54±2.73   | 6.44±1.13    | 11.18±0.25   | 8.18±1.39     | 8.87±1.47              |

**Table S3.** Biodistribution of Ag and/or Au NPs at 1 d and 28 d after the last injection. These results show mean and standard deviation, n=5.

| <b>IOMNs</b>    | <b>Heart (µg/g)</b> | <b>Liver (µg/g)</b> | <b>Spleen (µg/g)</b> | <b>Lung (µg/g)</b> | <b>Kidney (µg/g)</b> | <b>Brain (µg/g)</b> | <b>Stomach (µg/g)</b> | <b>Intestine (µg/g)</b> | <b>Testis (µg/g)</b> | <b>Seminal vesicle (µg/g)</b> |
|-----------------|---------------------|---------------------|----------------------|--------------------|----------------------|---------------------|-----------------------|-------------------------|----------------------|-------------------------------|
| AgNPs (D1)      | 5.00 ± 0.94         | 35.06±4.78          | 21.16±11.74          | 4.64±0.23          | 3.43±1.15            | 0.65±0.07           | 1.14±0.21             | 1.93±0.37               | 3.72±0.29            | 0.38±0.11                     |
| AuNPs (D1)      | 1.18±0.14           | 61.39 ± 19.99       | 12.98±1.03           | 1.06±0.23          | 5.27±0.72            | 0.69±0.04           | 0.60±0.08             | 0.75±0.18               | 0.82±0.18            | 0.18±0.01                     |
| AgNPs (D28)     | 3.85 ± 1.10         | 29.68±4.50          | 24.78±6.72           | 5.03±1.06          | 0.83±0.14            | 0.82±0.08           | 0.65±0.13             | 2.02±0.83               | 5.85±1.46            | 0.30±0.07                     |
| AuNPs (D28)     | 1.03±0.19           | 47.00±10.62         | 22.03±2.30           | 0.90±0.09          | 1.01±0.14            | 0.71±0.03           | 0.55±0.17             | 0.84±0.16               | 0.98±0.02            | 0.20±0.05                     |
| Control (AgNPs) | ND                  | ND                  | ND                   | ND                 | 0.01±0.003           | ND                  | ND                    | ND                      | ND                   | ND                            |
| Control (AuNPs) | 0.04±0.02           | 0.02±0.03           | 0.04±0.03            | 0.031±0.002        | 0.015±0.0003         | 0.02±0.0001         | 0.016±0.0002          | 0.02±0.0005             | 0.02±0.005           | 0.03±0.0017                   |

ND: not detected

**Table S4.** Recovery ratios of total applied doses of AgNPs and/or AuNPs in both time points. These results show mean and standard deviation, n=5.

| <b>Recovery Ratios of applied doses</b> |               |
|-----------------------------------------|---------------|
| AgNPs (D1)                              | 35.87± 9.94%  |
| AuNPs (D1)                              | 31.17± 9.67%  |
| AgNPs (D28)                             | 42.54± 18.87% |
| AuNPs (D28)                             | 27.78± 6.13%  |

**Table S5.** The primes used in qPCR.

| <b>Genes</b>     | <b>Descriptions</b>                                  | <b>Forward primers (5'—3')</b> | <b>Reverse primers (5'—3')</b> |
|------------------|------------------------------------------------------|--------------------------------|--------------------------------|
| <i>Bax</i>       | Bcl2-associated X protein (Bax)                      | GATGGCAACTTCAACTGGG            | CCGAAGTAGGAGAGGAGGC            |
| <i>Bcl-2</i>     | <i>Bcl-2</i>                                         | CACTCGACCTTGTTTCTTCCAG         | TCCTAACCCTTGCTCTGCTT           |
| <i>Caspase-8</i> | <i>Caspase-8</i>                                     | GGAAGATGACTTGAGCCTGCTTG        | CAAGGCTCATTCTTCTCTGTGC         |
| <i>Caspase-3</i> | <i>Caspase-3</i>                                     | GGAGGCTGACTTCCTGTATGCTT        | CCTGTTAACGCGAGTGAGAATG         |
| <i>Caspase-9</i> | <i>Caspase-9</i>                                     | AAGAAGACCGGAGTGCAATG           | CATGACAGGATTATAACAACCGC        |
| <i>p53</i>       | <i>p53</i>                                           | TACAAGAAGTCACAGCAC             | GATACTCGGGATACAAAT             |
| <i>Mt2</i>       | Metallothionein 2                                    | TGCATCTGCAAAGAGGCTTC           | AAGTTGTGGAGAACGGGTCAG          |
| <i>Mt1</i>       | Metallothionein 1                                    | CTGCTGCTCCTGCTGTC              | ACTGTATAGGAAGACGCTGG           |
| <i>Zip14</i>     | Zrt- and Irt-related protein 14                      | CATTGAAGTATGGGGGTACGGT         | ATGAAGTAGAGCAGGAGCCTCT         |
| <i>Trf</i>       | Transferrin                                          | CCGAACAACAAAGAGGAAT            | GGTTCTTTCCTTCGGTGTT            |
| <i>Hmox</i>      | Heme oxygenase 1                                     | ACCGCCTTCTGCTCAAC              | GAGGAGCGGTGTCTGGGAT            |
| <i>Sod 1</i>     | superoxide dismutase 1                               | TAACTGAAGGCCAGCATGGGT          | GGTCTCCAACATGCCTCTCTTC         |
| <i>Sod 2</i>     | superoxide dismutase 2                               | CAGACCTGCCTTACGACTATGG         | GCTGAAGAGCGACCTGAGTTGT         |
| <i>Fos</i>       | V-fos FBJ murine osteosarcoma viral oncogene homolog | GAAGGGAAAGGAATAAGATGGC         | AGTTGGTCTGTCTCCGCTTG           |
| <i>GADPH</i>     | Glyceraldehyde-3-phosphate dehydrogenase             | ACCCAGAGGACTGTGGATGG           | TCAGCTCTGGGATGACCTTG           |



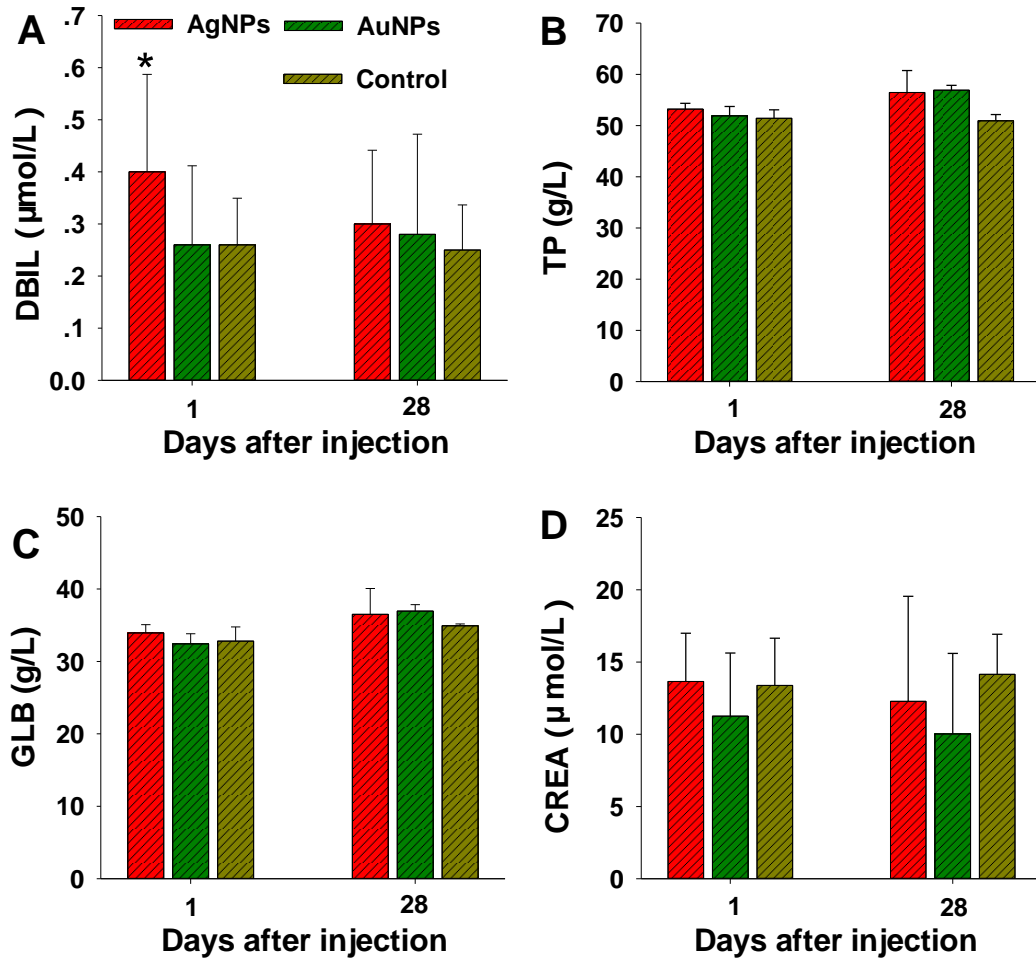

**Fig. S1** Serum biochemical analysis from animals treated with AgNPs and/or AuNPs and control. A-D) results exhibit mean and standard deviation of DBIL (A), TP (B), GLB (C), CREA (D). Abbreviations: direct bilirubin, DBIL; total protein, TP; globulin, GLB; creatinine, CRE. n=5. \*: P < 0.05 versus the control group.

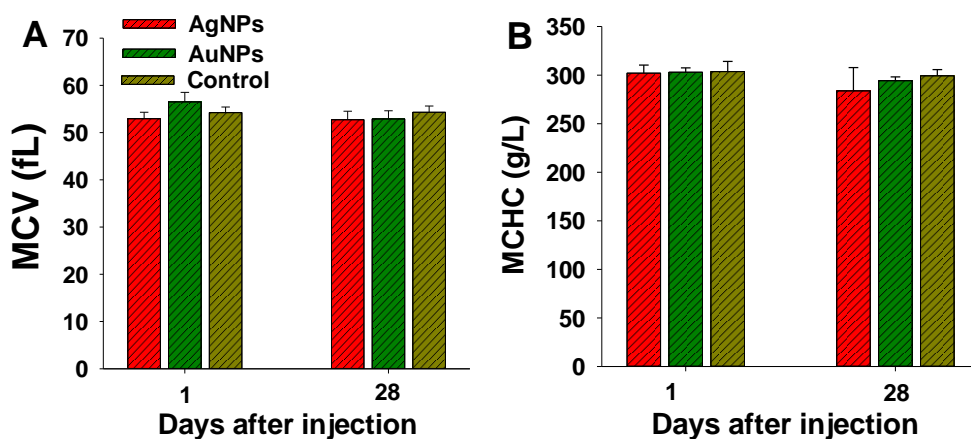

**Fig. S2** Whole blood analysis from animals treated with AgNPs and/or AuNPs and control. A,B results are based on mean and standard deviation of mean corpuscular volume (MCV) and mean corpuscular hemoglobin concentration (MCHC), respectively. These indicators are not significant changes ( $p < 0.05$ ),  $n=5$ .

Heart

Liver

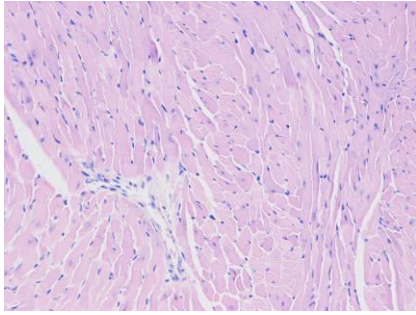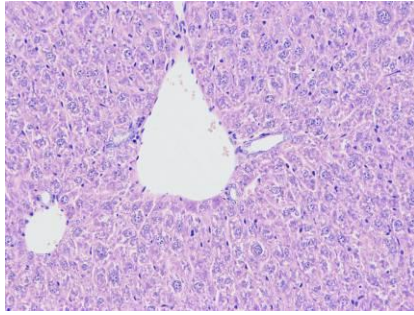

Control

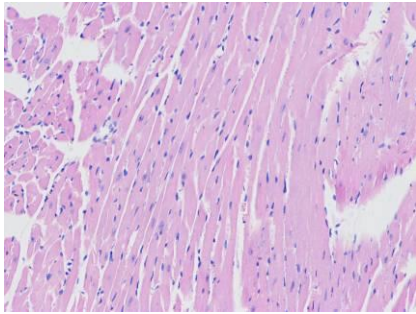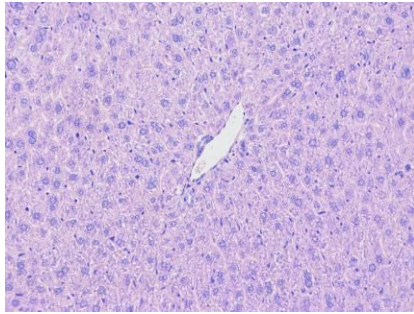

AgNPs (D1)

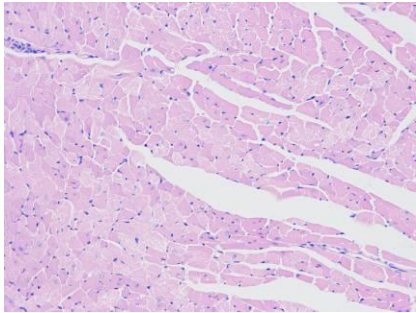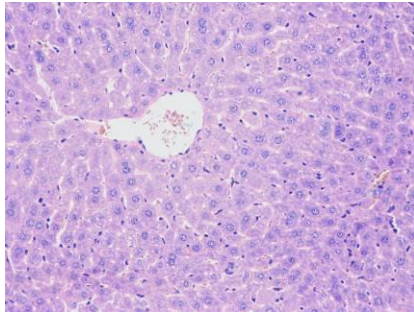

AuNPs (D1)

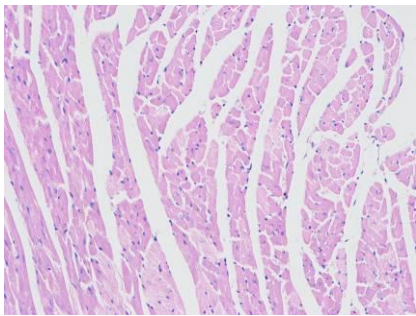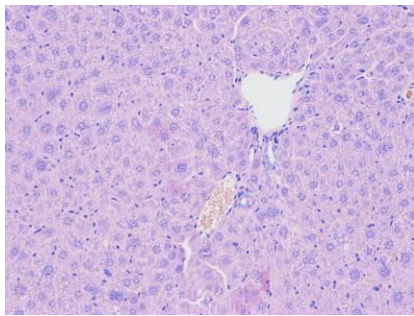

AgNPs (D28)

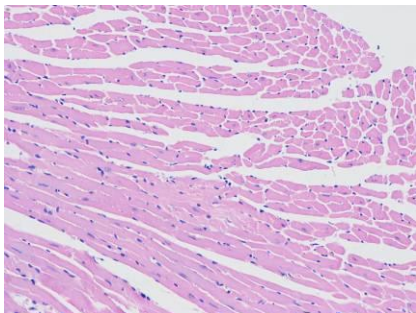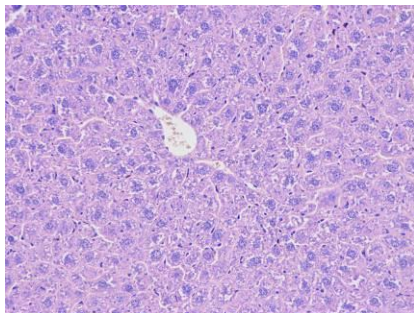

AgNPs (D28)



Spleen

Lungs

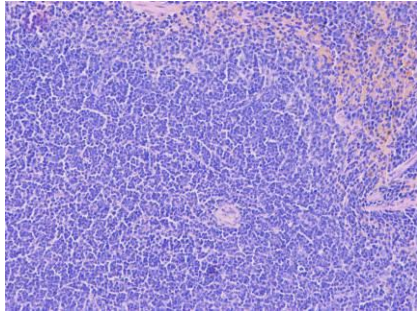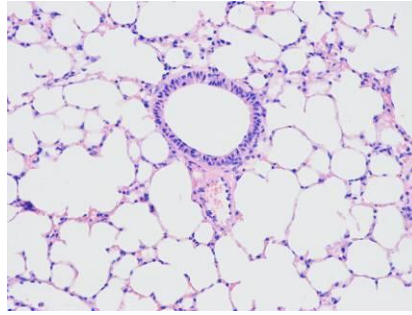

Control

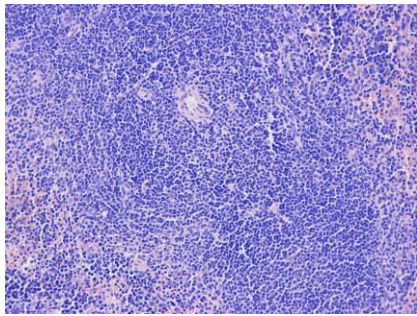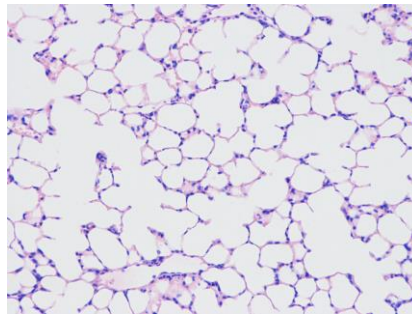

AgNPs (D1)

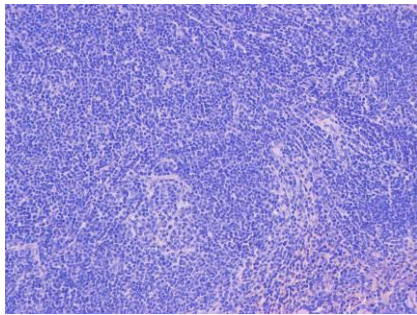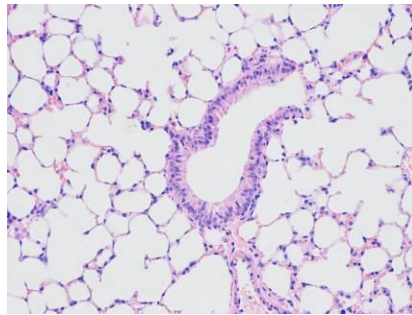

AuNPs (D1)

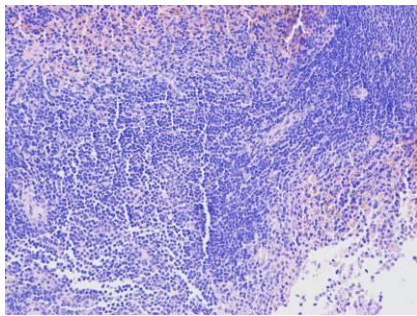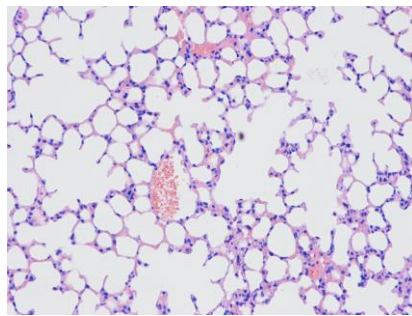

AgNPs (D28)

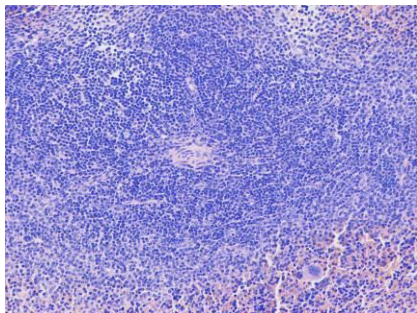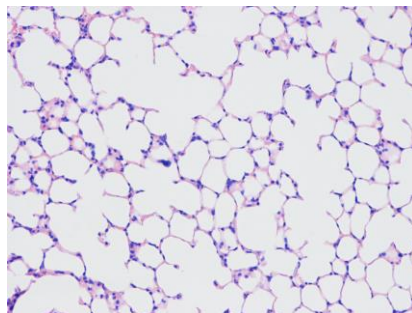

AuNPs (D28)



Kidney

Brain

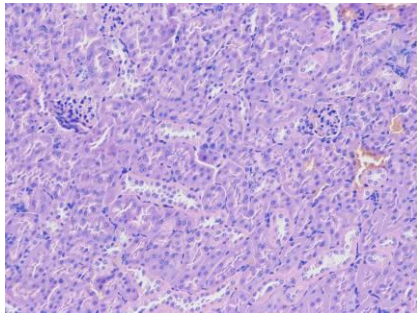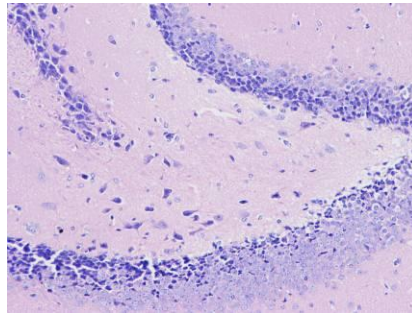

Control

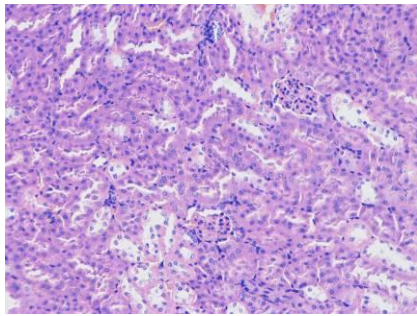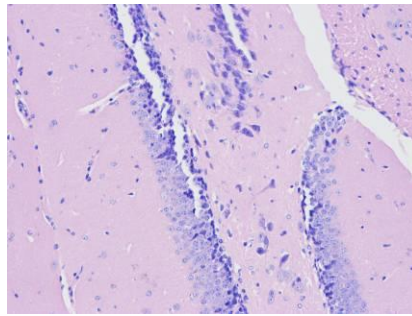

AgNPs (D1)

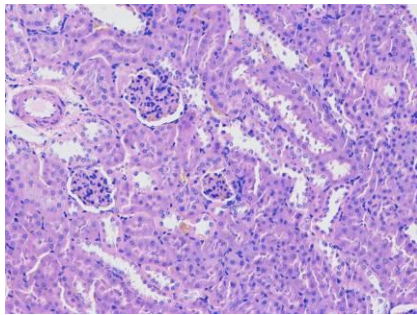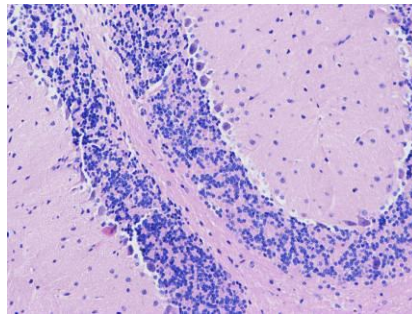

AuNPs (D1)

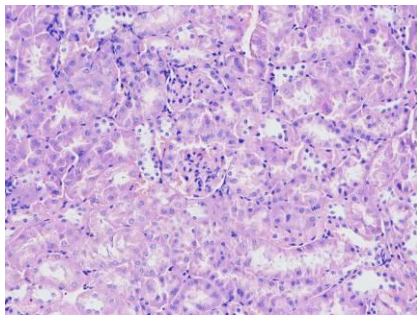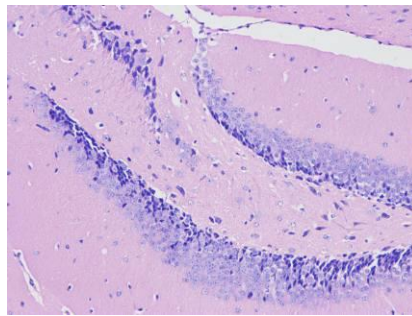

AgNPs (D28)

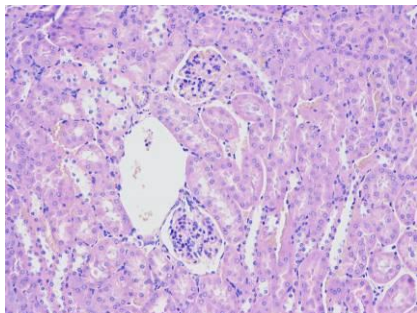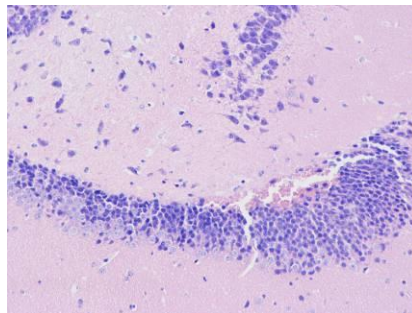

AuNPs (D28)



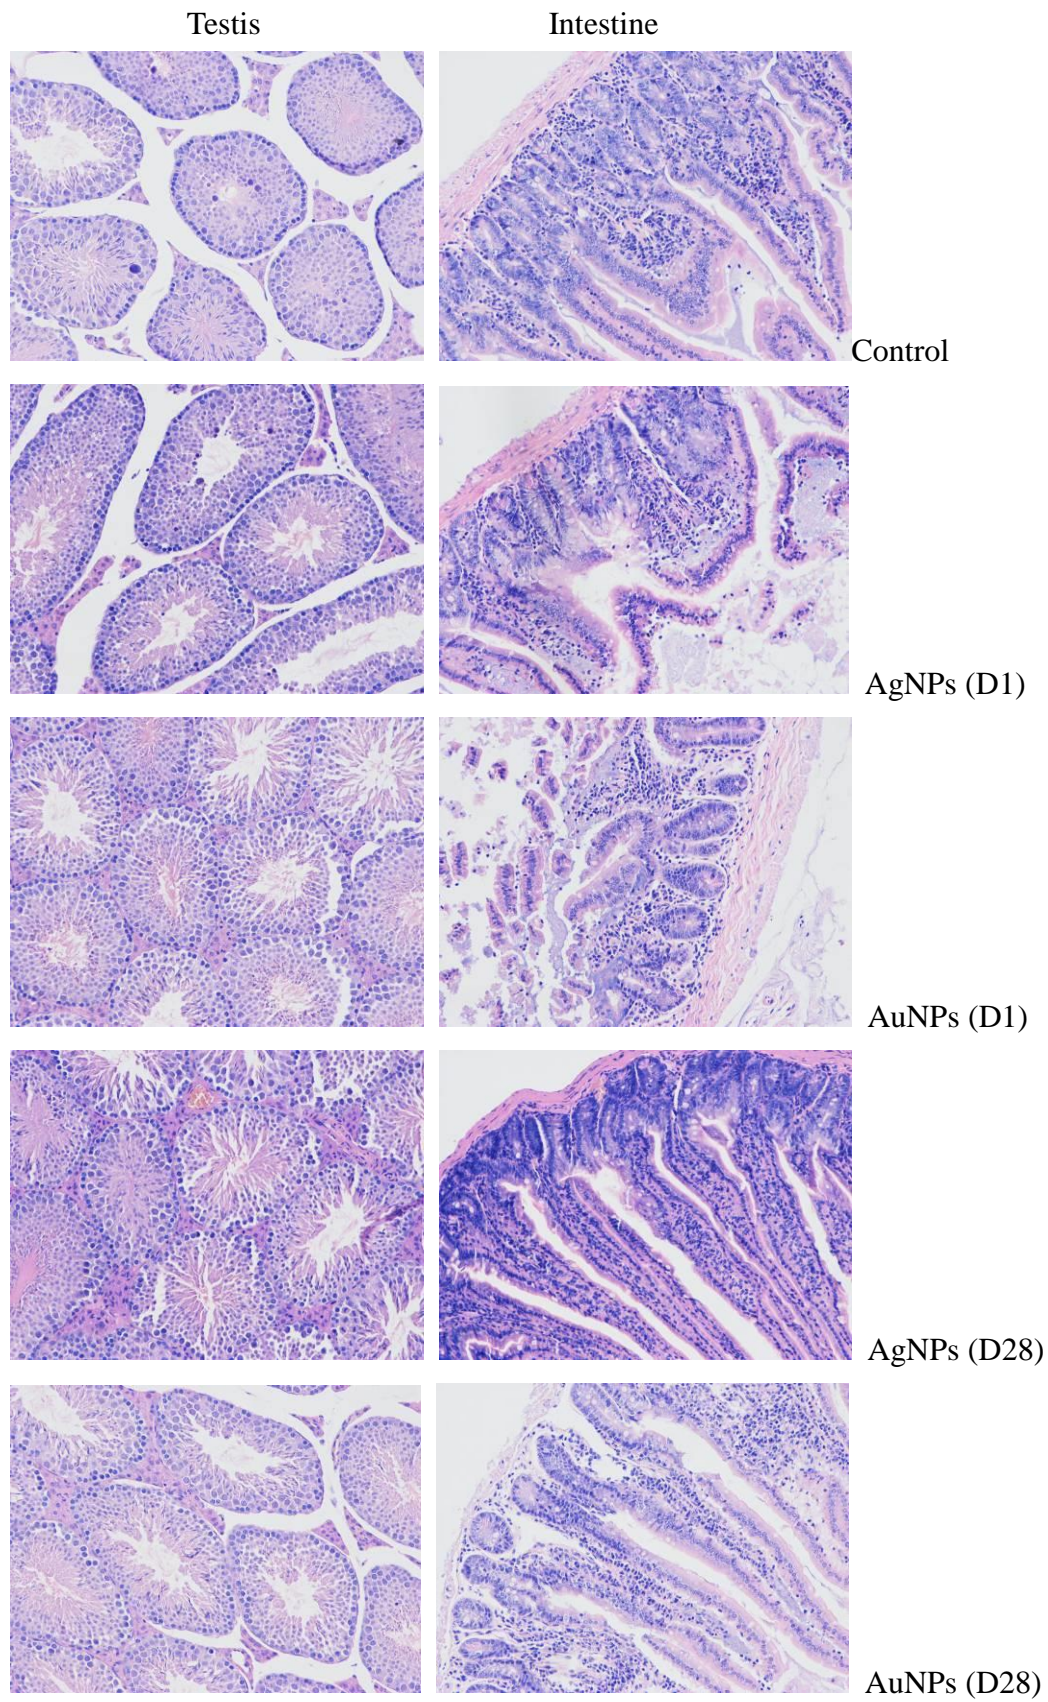

**Fig. S3** HE images of various organs of treated AgNPs and/or AuNPs mice. D1 and D28 refer to collection of mice organ on day 1 and day 28 after AgNPs and/or AuNPs administrations, respectively. n=5.
